# DNA copy number gains of *TCF4* (E2-2) are associated with poor outcome and the activated B-cell-like subtype of diffuse large B-cell lymphoma

*Running title: TCF4 Gains in DLBCL*

Keenan Hartert<sup>1</sup>, Saber Tadros<sup>1,2#</sup>, Alyssa Bouska<sup>3#</sup>, Dalia Moore<sup>1</sup>, Tayla Heavican<sup>3</sup>, Christine Pak<sup>4</sup>, Chih Long Liu<sup>5</sup>, Andrew Gentles<sup>6</sup>, Elena Hartmann<sup>7,8</sup>, Robert Kridel<sup>9</sup>, Karin Ekstrom Smedby<sup>10</sup>, Gunnar Juliusson<sup>11</sup>, David Klinkebiel<sup>12</sup>, Richard Rosenquist<sup>13</sup>, Randy Gascoyne<sup>14</sup>, Andreas Rosenwald<sup>7,8</sup>, Martin Bast<sup>15</sup>, Julie Vose<sup>15</sup>, Matthew Lunning<sup>15</sup>, Timothy Greiner<sup>3</sup>, Scott Rodig<sup>4</sup>, Javeed Iqbal<sup>3</sup>, Ash Alizadeh<sup>5</sup>, Michael R. Green<sup>1,2,16\*</sup>

<sup>1</sup>Eppley Institute for Research in Cancer and Allied Diseases, University of Nebraska Medical Center, Omaha, NE, USA; <sup>2</sup>Current Affiliation: Department of Lymphoma/Myeloma, University of Texas MD Anderson Cancer Center, Houston, TX, USA; <sup>3</sup>Department of Pathology and Immunology, University of Nebraska Medical Center, Omaha, NE, USA; <sup>4</sup>Department of Pathology, Brigham and Womens Hospital, Harvard Medical School, Boston, MA, USA; <sup>5</sup>Division of Oncology, Department of Medicine, Stanford University, Stanford, CA, USA; <sup>6</sup>Department of Radiology, Stanford University, Stanford, CA, USA; <sup>7</sup>Institute of Pathology, University of Würzburg, Würzburg, Germany; <sup>8</sup>Comprehensive Cancer Center Mainfranken. Würzburg, Germany; <sup>9</sup>Princess Margaret Cancer Center, University of Toronto, Toronto, ON, Canada; <sup>10</sup>Department of Medicine Solna, Clinical Epidemiology Unit, Karolinska Institutet, and Hematology Center, Karolinska University Hospital, Stockholm, Sweden; <sup>11</sup>Department of Laboratory Medicine, Stem Cell Center, Lund University, Lund, Sweden; <sup>12</sup>Department of Biochemistry and Molecular Biology, University of Nebraska Medical Center, Omaha, NE, USA; <sup>13</sup>Department of Molecular Medicine and Surgery, Karolinska Universitetssjukhuset, Stockholm, Sweden; <sup>14</sup>Center for Lymphoid Cancers, British Columbia Cancer Agency, Vancouver, BC, Canada; <sup>15</sup>Division of Hematology and Oncology, Department of Internal Medicine, University of Nebraska Medical Center, Omaha, NE, USA.; <sup>16</sup>Current Affiliation: Department of Genomic Medicine, University of Texas MD Anderson Cancer Center, Houston, TX, USA.

(#Equally contributed, \*Corresponding author)

\* To whom correspondence should be addressed:

Dr. Michael Green

Department of Lymphoma/Myeloma,

University of Texas MD Anderson Cancer Center,

Houston, TX 77030, USA

Phone: +1-713-745-4244

Email: [mgreen5@mdanderson.org](mailto:mgreen5@mdanderson.org)

Key words: Transcription factor, Lymphoma, Leukemia, B-cell

1 **ABSTRACT**

2 Diffuse large B-cell lymphoma (DLBCL) is the most common lymphoma and can be classified into  
3 two prognostically distinct molecular subtypes based upon transcriptional profiling. The activated  
4 B-cell (ABC)-like subtype is associated with a poor clinical outcome, and chronic activation of B-  
5 cell receptor signaling. Although many genetic alterations have been identified that contribute to  
6 this phenotype, these only account for a minority of cases. We employed public high-resolution  
7 DNA copy number profiles from 673 tumors to define the landscape of somatic copy number  
8 alterations (SCNAs) in DLBCL. Using integrative analysis of gene-expression profiling data, we  
9 found DNA-binding transcription factors to be a significantly enriched targets of SCNAs in DLBCL.  
10 We extended upon this observation in an additional 2,506 tumors from 6 other histologies, and  
11 found SCNA of transcription factors to be pervasive across B-cell malignancies. Furthermore, co-  
12 segregating SCNAs targeting transcription factors were associated with adverse patient outcome  
13 and the ABC-like subtype of DLBCL. This included a novel target of DNA copy number gain, *TCF4*  
14 (E2-2). Gains of *TCF4* were associated with a transcriptional signature that included increased  
15 expression of B-cell receptor signaling components. In a validation cohort of 124 DLBCL tumors  
16 interrogated by targeted sequencing, we found that *TCF4* DNA copy number gains significantly  
17 co-associate with somatic mutation of *CD79B* and *MYD88*. Together, these data suggest that  
18 SCNA of transcription factor genes are an important feature of B-cell malignancies, and these  
19 alterations may contribute to the ABC-like phenotype of DLBCL in tandem with other previously  
20 defined somatic alterations.

21

22

23

24

25

26

## 27 INTRODUCTION

28 B-cell development involves a complex set of processes that have evolved to yield a diverse but  
29 self-tolerant repertoire of immunoglobulin producing cells. These processes are tightly regulated  
30 by transcription factor networks and feedback loops that control proliferation, apoptosis, and  
31 progression of B-cells through the distinct stages of differentiation. Loss of homeostatic control  
32 via genetic aberrations during B-cell development can result in B-cell malignancies that bear  
33 resemblance to normal stages of differentiation (Shaffer et al. 2002; Kuppers 2005). These  
34 corresponding normal stages of development, or cell of origin, are part of the criteria for classifying  
35 entities of B-cell leukemia and lymphoma that are distinct with respect to their epidemiology,  
36 etiology, morphology, immunophenotype, and clinical behavior (Campo et al. 2011). For example,  
37 B-cell acute lymphoblastic leukemia (B-ALL) is characterized by disordered early B-cell  
38 development and the accumulation of precursor B-cells, whereas Multiple Myeloma (MM) is a  
39 malignancy of plasma cells – one of the terminal stages of B-cell differentiation.

40

41 The most common form of lymphoma, diffuse large B-cell lymphoma (DLBCL), can also be sub-  
42 classified into two prognostically distinct subsets based upon molecular similarities to B-cell  
43 developmental stages (Alizadeh et al. 2000). The germinal center B-cell-like (GCB-like) subtype  
44 of DLBCL shows transcriptional similarities to normal germinal center B-cells, whereas the  
45 activated B-cell-like (ABC-like) subtype shows transcriptional similarities to activated post-  
46 germinal center B-cells or plasmablasts. Importantly, patients with ABC-like DLBCL have  
47 significantly worse overall survival compared to patients with GCB-like DLBCL, when treated with  
48 either combination chemotherapy (CHOP) or combination chemotherapy with the addition of  
49 rituximab (R-CHOP) (Lenz et al. 2008b). A number of genetic alterations have been attributed to  
50 the 'activated' phenotype of ABC-like DLBCL through modification of signaling downstream of the  
51 B-cell receptor (BCR). These include activating mutations of the *CD79A/B*, *CARD11*, or *MYD88*  
52 genes (Lenz et al. 2008a; Davis et al. 2010; Ngo et al. 2011). However, these mutations only

53 account for a fraction of ABC-like DLBCL cases and much of the genetic basis for these tumors  
54 therefore remains to be defined.

55

56 A common mechanism for tumorigenesis is the gain or loss of DNA encoding oncogenes or tumor  
57 suppressor genes, respectively. These somatic copy number alterations (SCNA) can be profiled  
58 at high-resolution using single nucleotide polymorphism (SNP) microarrays or next-generation  
59 sequencing (NGS)-based techniques. Several prior studies have interrogated SCNAs in B-cell  
60 malignancies, but these were typically restricted in number and limited to a single histological  
61 subtype. Here, we show through the analysis of high-resolution DNA copy number profiles 3,179  
62 tumors of 7 different histologies that transcription factors are perturbed by SCNAs in B-cell  
63 malignancies, and may contribute to the etiology of the ABC-like subtype of DLBCL.

64

## 65 **RESULTS**

### 66 Transcription factors are targeted by DNA copy number gains in DLBCL

67 We used the GISTIC2 algorithm (Mermel et al. 2011) to analyze high resolution DNA copy number  
68 profiles from 673 DLBCL tumors. This algorithm integrates the frequency of alterations across a  
69 cohort, and the magnitude of these alterations, to allow the identification of statistically significant  
70 regions of DNA copy number gain or loss. The 'peak' of each alteration is defined as the smallest  
71 region with the highest significance of DNA copy gain/loss and contains a minimal set of genes  
72 that likely includes the target(s) that drive the alteration (Beroukhim et al. 2007; Beroukhim et al.  
73 2010). This method identified a total of 13 significant DNA copy number gains that contained 770  
74 genes in their peaks, and 22 significant DNA copy number losses that contained 1450 genes in  
75 their peaks (Figure 1a; Table S1).

76

77 The peaks of SCNAs identified by GISTIC contain one or more likely driver genes of each SCNA,  
78 but are also likely to contain passenger genes. In order to delineate between driver and passenger

79 genes, we performed an integrative analysis of 249 tumors with matched DNA copy number and  
80 gene expression microarray data (Table S2). This analysis identified 632 genes with significantly  
81 reduced gene transcript abundance in tumors with DNA copy number loss at GISTIC peaks  
82 compared to tumors without (FDR Q-value < 0.25, Figure 1b), and 435 genes with significantly  
83 higher gene transcript abundance in tumors with DNA copy number gain at a GISTIC peak  
84 compared to tumors without (FDR Q-value < 0.25, Figure 1c). Among these genes were well  
85 described targets of DNA copy number alterations in DLBCL, such as copy number losses with  
86 reduced expression of *TP53*, *TNFAIP3*, *PTEN* and *RB1*, and gains with increased expression of  
87 *REL*, *BCL11A* and *MDM2*. To identify cellular processes that are significantly altered by SCNAs,  
88 we performed hypergeometric enrichment analysis of, (i) genes that were targeted by DNA copy  
89 number loss and showed an associated significant reduction in expression, and (ii) genes that  
90 were targeted by DNA copy number gain and showed an associated significant increase in  
91 expression. This revealed a significant enrichment of cancer hallmark characteristics (Hanahan  
92 and Weinberg 2011) such as apoptosis and proliferation (Figure 1c, Table S3) among genes  
93 targeted by DNA copy number loss, in line with what is frequently observed in a variety of  
94 malignancies. However, analysis of the genes targeted by DNA copy number gain revealed a  
95 unique enrichment of genes possessing transcription factor activity (Figure 1c, Table S3). The  
96 most highly significant enrichment was 'Transcription Factor Activity, sequence-specific DNA  
97 binding' and 'Nucleic acid binding transcription factor' gene ontologies (FDR<0.001) that each  
98 included 58 unique genes that were targeted by DNA copy gain and showed an associated  
99 increase in transcript abundance in DLBCL. This highlights SCNA of transcription factor genes as  
100 a novel feature of DLBCL genomes.

101

102

103

104 The DNA copy number landscape in B-cell malignancies includes alterations of multiple  
105 developmentally regulated transcription factors.

106 Due to the potentially important role of transcription factor DNA copy number alterations in  
107 DLBCL, and the role of transcription factor networks in regulating B-cell differentiation, we next  
108 explored the DNA copy number landscape of other B-cell malignancies that align with different  
109 stages of B-cell differentiation. We included all subtypes of B-cell malignancy for which we could  
110 collect high resolution DNA copy number data from  $\geq 100$  tumors (Table S1). This included B-cell  
111 acute lymphoblastic leukemia (B-ALL,  $n=534$ , Figure S1), follicular lymphoma (FL,  $n=368$ , Figure  
112 S2), splenic/nodal marginal zone lymphoma (MZL,  $n=295$ , Figure S3), mantle cell lymphoma  
113 (MCL,  $n=206$ , Figure S4), chronic lymphocytic leukemia (CLL,  $n=544$ , Figure S5), and multiple  
114 myeloma (MM,  $n=559$ , Figure S6). These malignancies show contrasting DNA copy number  
115 landscapes at the level of aneusomies and arm-level gains and losses (Figure S7), leading us to  
116 analyze them individually using GISTIC rather than collectively. For example, B-ALL and MM  
117 tumors each showed patterns of hyperdiploidy, but these targeted alternate chromosomes in each  
118 disease. Analysis of data from each individual disease using GISTIC highlighted varying levels of  
119 genomic complexity and different peaks of DNA copy number gain and loss (Figure 2).  
120 Importantly, we observed DNA copy number alterations of multiple transcription factors that have  
121 been previously implicated in regulating B-cell development (Figure 2). These included those that  
122 have been previously described to be targeted by SCNAs, such as *IKZF1* (Mullighan et al. 2009),  
123 *REL* (Joos et al. 1996), *PRDM1* (Pasqualucci et al. 2006), *BCL6* (Green et al. 2014) and *MYC*  
124 (Rao et al. 1998). In addition, we identified novel DNA copy number alterations of transcription  
125 that have a defined role in B-cell development, such as loss of *POU2AF1* (OBF1), *NKX3-1*, *NKX3-*  
126 *2* and *IRF8*, and gains of *PBX1*, *IRF4*, and *TCF4* (E2-2). The analysis of an additional set of T-  
127 cell malignancies ( $n=261$ , Figure S8), myeloid ( $n=272$ , Figure S9), and solid tumors ( $n=1510$ ,  
128 Figure S10) (Beroukhim et al. 2010) allowed us to classify these as either disease-specific, B-  
129 cell-specific, lymphoid-specific, or multi-cancer alterations. This extends upon prior descriptions

130 of genetic alterations of transcription factors as key events in lymphomagenesis, and highlights  
131 transcriptional circuits that may be perturbed in specific subtypes or multiple subtypes of B-cell  
132 malignancies.

133

134 Co-segregating transcription factor alterations are associate with cell of origin subtype and poor  
135 outcome in DLBCL.

136 Our observation of different patterns of transcription factor alteration across subtypes of B-cell  
137 malignancies that align with diverse stages of B-cell development led us to hypothesize that such  
138 alterations may also contribute to the etiology of the GCB-like and ABC-like molecular subtypes  
139 of DLBCL. To identify characteristic patterns of SCNAs across DLBCL tumors, we used  
140 unsupervised hierarchical clustering of SCNAs that were present in  $\geq 10\%$  of DLBCL tumors (13  
141 gains and 22 losses) and tumors that possessed  $\geq 2$  SCNAs ( $n=481$ ; Figure 3a). As expected,  
142 SCNAs located on the same chromosome, but identified as unique GISTIC peaks, often co-  
143 segregate. This is driven by tumors that possess broad SCNAs, including arm-level gains/losses  
144 and aneuploidies, which may span multiple GISTIC peaks. The peaks are often defined by a  
145 subset of cases that possess focal copy number gain/loss over the smaller region, and likely  
146 define targets of both focal and broad SCNAs involving that chromosome. In addition to those on  
147 the same chromosome, we also observed co-segregation between DNA copy number gains on 3  
148 different chromosomes; 3q27, 18q21, and 19p13.3 (Figure 3a). These alterations have previously  
149 been defined as targeting the *BCL6* transcription factor (Green et al. 2014), the anti-apoptotic  
150 *BCL2* oncogene (Monni et al. 1997) and the *SP1B* transcription factor (Lenz et al. 2008c),  
151 respectively. We performed cell of origin subtype classification on the 249 samples with matched  
152 gene expression microarray and DNA copy number data, and identified associations between the  
153 GCB-like or ABC-like subtypes and the presence of each SCNA using a Fisher test. This revealed  
154 that the three co-segregating DNA copy number gains at 3q27, 18q21 and 19p13.3 were also  
155 significantly associated with the ABC-like subtype of DLBCL (Figure 3b, e). As this subtype has

156 an inferior prognosis compared to the GCB-like subtype, we also assessed the association  
157 between SCNAs and overall survival in cohorts treated with combination chemotherapy (CHOP,  
158 n=232) or combination chemotherapy with rituximab (R-CHOP, n=197) using a log-rank test  
159 (Figure 3c-d). This showed that these lesions were also each associated with inferior overall  
160 survival, as confirmed by Kaplan-Meier analysis (Figure 3f).

161

162 Gains of 18q21 target the *TCF4* (E2-2) transcription factor.

163 The involvement of the *BCL6* transcription factor at 3q27 (Green et al. 2014) and the *SPIB*  
164 transcription factor at 19p13.3 (Lenz et al. 2008c) has been previously demonstrated. We  
165 therefore focused on 18q21 gains. In contrast to prior observations, GISTIC analysis showed that  
166 the most significant peak of DNA copy number gain did not include the *BCL2* oncogene (Figure  
167 4a). The 1.58Mbp peak identified by GISTIC included 3 genes, all of which showed significantly  
168 increased gene expression in association with these alterations. This included *TXNL1*, *WDR7*,  
169 and the *TCF4* transcription factor (Figure 4b). The *TCF4* gene has been previously implicated in  
170 regulating immunoglobulin gene expression through binding of the immunoglobulin enhancer  
171 (Gloury et al. 2016; Wohner et al. 2016), and we therefore hypothesized that it may have a  
172 potential role in promoting BCR signaling in ABC-like DLBCL. The localization of the GISTIC peak  
173 to the *TCF4* rather than *BCL2* was driven by the 15% of cases with 18q21 DNA copy number  
174 gains that included the *TCF4* gene but not the *BCL2* gene. In contrast, only 11% of cases with  
175 18q21 DNA copy number gains included the *BCL2* gene but not the *TCF4* gene. However, the  
176 majority of tumors with 18q21 DNA copy number gains included both the *TCF4* and *BCL2* genes,  
177 highlighting both of these genes as likely important targets of this alteration (Figure 4c). This is  
178 supported by the significant increase in *BCL2* expression in ABC-like DLBCL tumors associated  
179 with 18q21 DNA copy number gains (Figure S11).

180



181 *TCF4* Gains Are Associated with Increased Immunoglobulin Expression and Co-Segregate with  
182 *CD79B* and *MYD88* Mutations

183 Chronic activation of immunoglobulin signaling is an important feature of ABC-like DLBCL (Davis  
184 et al. 2010) and we hypothesized that *TCF4* copy gain may contribute to this phenotype. To  
185 investigate this, we performed a genome-wide assessment of the transcriptional consequences  
186 of *TCF4* DNA copy number gain. Differential gene expression analysis identified 411 genes with  
187 significantly increased and 251 genes with significantly decreased gene transcript abundance  
188 associated with *TCF4* gain (Fold-change  $\geq 1.2$ , FDR Q-value  $< 0.1$ ; Figure 5a; Table S4). In line  
189 with the previous implication of *TCF4* in regulating immunoglobulin heavy chain expression (Ernst  
190 and Smale 1995; Gloury et al. 2016; Wohner et al. 2016), we observed significantly increase Ig  
191 heavy chain  $\mu$  (IGHM) gene expression in cases with *TCF4* DNA copy number gain. In addition,  
192 we observed increased expression of multiple other signaling components downstream of the  
193 BCR, including *CD79A*, *LYN*, *BLNK*, *CARD11* and *PIK3CA*. To provide additional support for a  
194 direct role of TCF4 in inducing these changes, we utilized publicly available TCF4 ChIP-seq data  
195 (Ceribelli et al. 2016) to determine whether TCF4 binds to the regulatory regions of these genes.  
196 This revealed a peak of TCF4 binding at the transcription start-sites of genes with increased  
197 expression associated with TCF4 DNA copy number gain (Figure 5b), including binding in intronic  
198 region of the immunoglobulin heavy-chain locus (Figure 5c), supporting their likely transcriptional  
199 regulation by TCF4.

200  
201 BCR signaling is also perturbed by somatic mutations of *CARD11*, *CD79B* and *MYD88* in ABC-  
202 like DLBCL (Lenz et al. 2008a; Davis et al. 2010; Ngo et al. 2011), and the relative representation  
203 of these alterations may impact responses to inhibitors of the BCR signaling pathway such as  
204 Ibrutinib (Wilson et al. 2015). We therefore assessed the representation of these alterations in an  
205 additional cohort of 124 DLBCL tumors that we interrogated by targeted NGS, for which 70 had  
206 available cell of origin subtype information (Garcia-Ramirez et al. 2017). Somatic mutations were

207 identified in *CARD11* (16%, 20/124), *CD79B* (9%, 11/124) and *MYD88* (13%, 16/124) at similar  
208 frequencies to prior descriptions (Lenz et al. 2008a; Davis et al. 2010; Ngo et al. 2011). In addition,  
209 we utilized the CopyWriteR algorithm (Kuilman et al. 2015) to interrogate SCNAs, and identified  
210 *TCF4* gains in 17% (21/124) of cases (Figure 6a). Mutations in *CARD11* did not appear to  
211 associate with either subtype, but mutations in *CD79B* and *MYD88* and DNA copy number gains  
212 in *TCF4* were more prevalent in the ABC-like subtype as expected. Using a Fisher test, we also  
213 observed a significant co-association between *TCF4* gains, *CD79B* mutations and *MYD88*  
214 mutations, suggesting that these may not be redundant mechanisms for activating BCR signaling,  
215 but may function in tandem. This is in line with recent data showing that *CD79B* and *MYD88*  
216 mutations act synergistically to promote BCR signaling (Wang et al. 2017). Together, these results  
217 implicate *TCF4* DNA copy number gains in the BCR signaling phenotype of ABC-like DLBCL and  
218 suggest that they may function together with other BCR signaling mutations.

219

## 220 **DISCUSSION**

221 Deregulation of transcription factor activity has long been linked to the etiology of B-cell  
222 malignancies as a result of the recurrent targeting of transcription factors by translocations. This  
223 includes fusion of the *TCF3* and *PBX1* genes (Mullighan 2012) and deletion of *IKZF1* in B-ALL  
224 (Mullighan et al. 2009), the activation of *MYC*, *BCL6*, and *PAX5* and by translocations with the  
225 immunoglobulin locus in mature B-cell lymphoma (Willis and Dyer 2000), and translocation of  
226 *IRF4* in multiple myeloma (Iida et al. 1997). We have extended upon these observations by  
227 showing that DNA-binding transcription factors are enriched targets for DNA copy number gains  
228 in DLBCL, and that unique transcription factors are perturbed across the differentiation spectrum  
229 of B-cell malignancies.

230

231 Although many of the targets of SCNAs in DLBCL have been previously described by other  
232 studies (Monti et al. 2012) the larger numbers of tumors that were analyzed by this study allowed

233 us to identify novel targets such as *TCF4*. Furthermore, we are the first to show that transcription  
234 factors are an enriched target of DNA copy number gains in this disease, and that co-segregating  
235 transcription factor alterations are associated with the ABC-like subtype and poor outcome. We  
236 have recently shown that transient activity of *BCL6* linked to DNA copy number gains at 3q27 are  
237 sufficient to induce lymphoma resembling ABC-like DLBCL in mice (Green et al. 2014), providing  
238 a validation of the association between this SCNA and the ABC-like subtype that we observed  
239 here. However, it also highlights that integrative analysis may overlook a small number of SCNA  
240 driver genes if they have regulatory feedback loops and do not require persistent expression or  
241 suppression to have an oncogenic effect. In addition, GISTIC peaks identify the genes that are  
242 altered with the highest magnitude across the highest frequency of tumors. This may also result  
243 in some genes that drive specific SCNAs in a minority of cases to be overlooked. For example,  
244 although the *BCL2* oncogene is not identified with the peak of the 18q21 DNA copy number gain  
245 within the DLBCL cohort in this study because of the 15% of tumors that show gains of *TCF4* but  
246 not *BCL2*, it likely has a 'driver' role for large SCNAs of 18q in the 74% of cases in which it was  
247 co-amplified along with *TCF4*, and is likely the main driver of small SCNAs in this region in the  
248 11% of cases in which *BCL2* is amplified but *TCF4* is not. This study therefore overlooks a small  
249 number of likely driver genes, but instead focusses on the most significant set of genes with the  
250 greatest amount of evidence for being drivers of SCNAs.

251

252 In addition to DNA copy number gains of 3q27, we found that gains of 19p13 and 18q21 co-  
253 segregated within a set of cases that were highly enriched for the ABC-like DLBCL subtype. This  
254 subtype is characterized by chronically active B-cell receptor signaling and constitutive NFκB  
255 activity that is, in part, driven by somatic mutations of genes such as *CD79B* (Davis et al. 2010),  
256 *CARD11* (Lenz et al. 2008a) and *MYD88* (Ngo et al. 2011). However, these mutations only  
257 account for a subset of cases. DNA copy number gain of the *SPIB* transcription factor gene at  
258 19p13 has been previously identified as being associated with the ABC-like subtype and was

259 postulated to contribute to the pathogenesis of these tumors by promoting the expression of  
260 genes with a role in NF $\kappa$ B signaling. We are the first to describe an association between SCNA  
261 of the *TCF4* transcription factor gene at 18q21 and the ABC-like DLBCL subtype. This gene is  
262 part of the E2 family of transcription factors and has a well-defined role in regulating the  
263 expression of immunoglobulin genes and other developmental programs during B-cell  
264 differentiation (Gloury et al. 2016; Wohner et al. 2016). We noted that immunoglobulin heavy-  
265 chain genes also showed higher expression in cases with *TCF4* DNA copy number gain, and that  
266 this region is bound by *TCF4* in other cell types, suggesting that this alteration may promote higher  
267 surface immunoglobulin expression and contribute towards chronic active signaling. However, the  
268 association between genetic alterations of *TCF4* and the ABC-like DLBCL subtype would best be  
269 validated in a transgenic mouse model to confirm this hypothesis, and validation of *TCF4* target  
270 genes should additionally be performed in both non-malignant human B-cells and primary DLBCL  
271 tumor cells. This may be an important area of investigation, as other genetic alterations that affect  
272 B-cell receptor signaling have been linked to the variable clinical efficacy of inhibitors of this  
273 pathway such as Ibrutinib (Wilson et al. 2015). We noted that *CD79B* and *MYD88* mutations  
274 significantly co-segregated, supporting recent findings that they act cooperatively to promote BCR  
275 signaling (Wang et al. 2017). Importantly, we observed that *TCF4* DNA copy number gains also  
276 co-segregate with both *CD79B* and *MYD88* mutation, and we therefore suggest that these  
277 alterations may also act cooperatively to promote BCR signaling and the ABC-like DLBCL  
278 phenotype.

279  
280 A recent study highlighted a potential alternative avenue for therapeutic targeting of *TCF4* using  
281 bromodomain inhibitors, as BRD4 was found to regulate *TCF4* expression (Ceribelli et al. 2016).  
282 However, *BCL2* over-expression has been highlighted as a potential resistance mechanism to  
283 bromodomain inhibitors (Bui et al. 2017), and is also targeted by 18q21 DNA copy number gains  
284 in the majority of cases. Importantly, this study also showed synergy between the *BCL2* inhibitor,

285 Venetoclax, and a bromodomain inhibitor, ABBV-075, suggesting that combination of these  
286 agents may be an attractive therapeutic strategy for DLBCL – particularly those tumors harboring  
287 18q21 DNA copy number gains.

288

289 In conclusion, we have provided evidence for an important role of DNA copy number alterations  
290 of transcription factors in B-cell malignancies, particularly the ABC-like subtype of DLBCL. We  
291 highlight *TCF4* as a novel target for DNA copy number gains of 18q21, and suggest that these  
292 alterations may function in tandem with other mutations to promote the expression and activity of  
293 BCR signaling components.

294

295

296

297

298

299

300

301

302

303

304

305

306

307

308

309

310

311 **METHODS**

312 DNA copy number data acquisition and processing

313 Publicly available data for single nucleotide polymorphism microarrays and array comparative  
314 genome hybridization platforms with 200,000 markers were downloaded from the gene  
315 expression omnibus ([www.ncbi.nlm.nih.gov/geo/](http://www.ncbi.nlm.nih.gov/geo/)). These included Affymetrix 250K and SNP 6.0  
316 platforms, and the Agilent 244K platform. The data originated from 36 studies, including 9 unique  
317 B-cell malignancies aligning with different stages of B-cell development (Rosenwald et al. 2003;  
318 Kuiper et al. 2007; Mullighan et al. 2007; Lenz et al. 2008c; Mullighan et al. 2008a; Mullighan et  
319 al. 2008b; Paulsson et al. 2008; Avet-Loiseau et al. 2009; Compagno et al. 2009; Kato et al. 2009;  
320 Kawamata et al. 2009; Dickens et al. 2010; Kuiper et al. 2010; Lilljebjorn et al. 2010; Mosca et al.  
321 2010; Walker et al. 2010; Challa-Malladi et al. 2011; Chapman et al. 2011; Green et al. 2011;  
322 Gunnarsson et al. 2011; Oricchio et al. 2011; Rinaldi et al. 2011; Fresquet et al. 2012; Monti et  
323 al. 2012; Rohde et al. 2012; Bea et al. 2013; Bodker et al. 2013; Chigrinova et al. 2013; Harder  
324 et al. 2013; Salaverria et al. 2013; Bouska et al. 2014; Diakos et al. 2014; Li et al. 2014; Messina  
325 et al. 2014; Okosun et al. 2014; Green et al. 2015). For comparison, raw data were also acquired  
326 from an additional 31 studies including 261 T-cell malignancies, 272 myeloid malignancies, and  
327 1510 solid tumors (Table S5) (Kuiper et al. 2007; Chen et al. 2008; Chiang et al. 2008; Haverty  
328 et al. 2008; Scotto et al. 2008; Akagi et al. 2009; Bass et al. 2009; Castro et al. 2009; Forshew et  
329 al. 2009; Goransson et al. 2009; Haverty et al. 2009; Hu et al. 2009; Northcott et al. 2009; Radtke  
330 et al. 2009; Reid et al. 2009; Schraders et al. 2009; Sos et al. 2009; Tosello et al. 2009; Beroukhim  
331 et al. 2010; Bullinger et al. 2010; Hartmann et al. 2010; Nowak et al. 2010; Poage et al. 2010;  
332 Huang et al. 2011; Micke et al. 2011; Miller et al. 2011; Dulak et al. 2012; Kondo et al. 2012;  
333 Rucker et al. 2012; Wilkerson et al. 2012; Yamagishi et al. 2012). For Affymetrix microarrays, raw  
334 cel files were extracted and copy number predicted using the Affymetrix Copy Number Analysis  
335 for Genechip (CNAG) tool, with reference to data from 100 caucasian HapMap samples (Table  
336 S5). Agilent data was analyzed using BioConductor, as previously described (Lenz et al. 2008c).

337 Data for all arrays were represented as Log2 copy number change and segmented using the  
338 circular binary segmentation (CBS) tool on GenePattern (Reich et al. 2006). Peaks of significant  
339 DNA copy number loss and gain were identified using GISTIC2.0 (Mermel et al. 2011). The  
340 thresholds utilized for DNA copy number gain and loss were 0.1 copies, over a region  
341 encompassing 100 markers.

342

#### 343 Integrative Analysis and Hypergeometric Enrichment Analysis

344 Raw cel files for matched Affymetrix U133 Plus 2.0 gene expression microarray data were  
345 obtained for 249 DLBCL (GSE11318 and GSE34171) from the Gene Expression Omnibus (Lenz  
346 et al. 2008c; Monti et al. 2012). Data were RMA normalized and the two DLBCL datasets batch-  
347 corrected using ComBat (Johnson et al. 2007). Differential gene expression analysis was  
348 performed between samples with or without a given lesion using a Students T-test, and corrected  
349 for multiple hypothesis testing by the Benjamini-Hochberg method. Genes with a fold-change  $\geq 1.2$   
350 in the direction of the copy number alteration and a false-discovery rate  $< 0.25$  were considered  
351 statistically significant. To define targets of SCNA, the differential gene expression analysis was  
352 limited to only the genes within the GISTIC-defined peak of each SCNA. To identify the signature  
353 associated with 18q21 DNA copy number gain, differential gene expression analysis was  
354 performed on the 10,000 most variably expressed genes across the dataset as determined by  
355 median absolute deviation. Significantly altered genes targeted by DNA copy number gains and  
356 losses were analyzed separately for enriched gene ontology biological process (GO-BP) terms  
357 using DAVID (Huang et al. 2007), with an FDR  $< 0.25$  and a fold-change direction corresponding  
358 to the direction of the copy number alteration being considered significant.

359

#### 360 Survival and Cell of Origin Subtype Association

361 For visualization of co-association, each lesion was scored as a binary present/absent  
362 classification in each case and clustered using Spearman's rank correlation. Only SCNAs that

363 were present in  $\geq 10\%$  of DLBCL tumors (13 gains and 22 losses) and tumors that possessed  $\geq 2$   
364 SCNAs (n=481) were included. DLBCL tumors were classified by cell of origin using the Wright  
365 algorithm (Wright et al. 2003). Association between SCNAs and COO subtype were determined  
366 using a Fisher exact test. Overall survival data was collated from previous studies for 232 DLBCL  
367 patients treated with CHOP combination chemotherapy (Lenz et al. 2008c; Monti et al. 2012), and  
368 197 DLBCL patients treated with CHOP combination chemotherapy plus the anti-CD20  
369 monoclonal antibody rituximab (R-CHOP) (Scandurra et al. 2010; Monti et al. 2012). Associations  
370 between the presence of a SCNA and overall survival were assessed using a log-rank test.

371

### 372 ChIP-Seq Data Analysis

373 Previously described chromatin immunoprecipitation sequencing data for TCF4 (Ceribelli et al.  
374 2016) were downloaded from the gene expression omnibus (GSE75650). Raw FASTQ files were  
375 mapped to the human genome (UCSC hg19) using BWA-Mem (Li 2013), and sorted and  
376 deduplicated using Picard tools. The physical location of transcription start sites for genes with  
377 significantly increase expression associated with 18q21 DNA copy number gains were collated  
378 using the UCSC Table Browser (Karolchik et al. 2004). Raw data were visualized using the  
379 integrative genomics viewer (Robinson et al. 2011), and heatmaps were created for visualization  
380 of TCF4 signal at transcription start sites using EaSeq (Lerdrup et al. 2016).

381

### 382 Identification of Somatic Mutations and DNA Copy Number Alterations from Next Generation 383 Sequencing Data.

384 Targeted sequencing of 380 genes that are recurrently mutated in B-cell lymphoma was  
385 performed previously for 124 primary DLBCL tumors from the University of Nebraska Medical  
386 Center (Garcia-Ramirez et al. 2017). Raw FASTQ files were mapped to the human genome  
387 (UCSC hg19) using BWA-Mem (Li 2013), realigned around InDels and sorted using the Genome  
388 Analysis Toolkit (McKenna et al. 2010), and duplicates removed using Picard tools. Single



389 nucleotide variants and small insertion/deletions were identified using the GATK Unified  
390 Genotyper (McKenna et al. 2010) and VarScan2 (Koboldt et al. 2012), with only variants being  
391 called by both algorithms being considered true. VCF files were annotated using SeattleSeq (Ng  
392 et al. 2009), and single nucleotide variants annotated in dbSNP or variants falling within regions  
393 of tandem repeats were removed. Variants were required to be within a region of  $\geq 100X$  coverage  
394 and have  $\geq 3$  supporting reads on each strand. Somatic copy number alterations from targeted  
395 sequencing data were identified using CopyWriteR (Kuilman et al. 2015), with 100kb bins.

396

## 397 REFERENCES

- 398 Akagi T, Shih LY, Kato M, Kawamata N, Yamamoto G, Sanada M, Okamoto R, Miller CW, Liang DC, Ogawa  
399 S et al. 2009. Hidden abnormalities and novel classification of t(15;17) acute promyelocytic  
400 leukemia (APL) based on genomic alterations. *Blood* **113**: 1741-1748.
- 401 Alizadeh AA, Eisen MB, Davis RE, Ma C, Lossos IS, Rosenwald A, Boldrick JC, Sabet H, Tran T, Yu X et al.  
402 2000. Distinct types of diffuse large B-cell lymphoma identified by gene expression profiling.  
403 *Nature* **403**: 503-511.
- 404 Avet-Loiseau H, Li C, Magrangeas F, Gouraud W, Charbonnel C, Harousseau JL, Attal M, Marit G, Mathiot  
405 C, Facon T et al. 2009. Prognostic significance of copy-number alterations in multiple myeloma.  
406 *Journal of clinical oncology : official journal of the American Society of Clinical Oncology* **27**: 4585-  
407 4590.
- 408 Bass AJ, Watanabe H, Mermel CH, Yu S, Perner S, Verhaak RG, Kim SY, Wardwell L, Tamayo P, Gat-Viks I  
409 et al. 2009. SOX2 is an amplified lineage-survival oncogene in lung and esophageal squamous cell  
410 carcinomas. *Nature genetics* **41**: 1238-1242.
- 411 Bea S, Valdes-Mas R, Navarro A, Salaverria I, Martin-Garcia D, Jares P, Gine E, Pinyol M, Royo C, Nadeu F  
412 et al. 2013. Landscape of somatic mutations and clonal evolution in mantle cell lymphoma.  
413 *Proceedings of the National Academy of Sciences of the United States of America* **110**: 18250-  
414 18255.
- 415 Beroukhi R, Getz G, Nghiemphu L, Barretina J, Hsueh T, Linhart D, Vivanco I, Lee JC, Huang JH, Alexander  
416 S et al. 2007. Assessing the significance of chromosomal aberrations in cancer: methodology and  
417 application to glioma. *Proceedings of the National Academy of Sciences of the United States of*  
418 *America* **104**: 20007-20012.
- 419 Beroukhi R, Mermel CH, Porter D, Wei G, Raychaudhuri S, Donovan J, Barretina J, Boehm JS, Dobson J,  
420 Urashima M et al. 2010. The landscape of somatic copy-number alteration across human cancers.  
421 *Nature* **463**: 899-905.
- 422 Bodker JS, Gyruup C, Johansen P, Schmitz A, Madsen J, Johnsen HE, Bogsted M, Dybkaer K, Nyegaard M.  
423 2013. Performance comparison of Affymetrix SNP6.0 and cytogenetic 2.7M whole-genome  
424 microarrays in complex cancer samples. *Cytogenet Genome Res* **139**: 80-87.
- 425 Bouska A, McKeithan TW, Deffenbacher KE, Lachel C, Wright GW, Iqbal J, Smith LM, Zhang W, Kucuk C,  
426 Rinaldi A et al. 2014. Genome-wide copy-number analyses reveal genomic abnormalities involved  
427 in transformation of follicular lymphoma. *Blood* **123**: 1681-1690.

- 428 Bui MH, Lin X, Albert DH, Li L, Lam LT, Faivre EJ, Warder S, Huang X, Wilcox D, Donawho CK et al. 2017.  
429 Preclinical characterization of BET family bromodomain inhibitor ABBV-075 suggests combination  
430 therapeutic strategies. *Cancer research* doi:10.1158/0008-5472.CAN-16-1793.
- 431 Bullinger L, Kronke J, Schon C, Radtke I, Urlbauer K, Botzenhardt U, Gaidzik V, Cario A, Senger C, Schlenk  
432 RF et al. 2010. Identification of acquired copy number alterations and uniparental disomies in  
433 cytogenetically normal acute myeloid leukemia using high-resolution single-nucleotide  
434 polymorphism analysis. *Leukemia* **24**: 438-449.
- 435 Campo E, Swerdlow SH, Harris NL, Pileri S, Stein H, Jaffe ES. 2011. The 2008 WHO classification of lymphoid  
436 neoplasms and beyond: evolving concepts and practical applications. *Blood* **117**: 5019-5032.
- 437 Castro P, Creighton CJ, Ozen M, Berel D, Mims MP, Ittmann M. 2009. Genomic profiling of prostate cancers  
438 from African American men. *Neoplasia* **11**: 305-312.
- 439 Ceribelli M, Hou ZE, Kelly PN, Huang DW, Wright G, Ganapathi K, Evbuomwan MO, Pittaluga S, Shaffer AL,  
440 Marcucci G et al. 2016. A Druggable TCF4- and BRD4-Dependent Transcriptional Network Sustains  
441 Malignancy in Blastic Plasmacytoid Dendritic Cell Neoplasm. *Cancer cell* **30**: 764-778.
- 442 Challa-Malladi M, Lieu YK, Califano O, Holmes AB, Bhagat G, Murty VV, Dominguez-Sola D, Pasqualucci L,  
443 Dalla-Favera R. 2011. Combined genetic inactivation of beta2-Microglobulin and CD58 reveals  
444 frequent escape from immune recognition in diffuse large B cell lymphoma. *Cancer cell* **20**: 728-  
445 740.
- 446 Chapman MA, Lawrence MS, Keats JJ, Cibulskis K, Sougnez C, Schinzel AC, Harview CL, Brunet JP, Ahmann  
447 GJ, Adli M et al. 2011. Initial genome sequencing and analysis of multiple myeloma. *Nature* **471**:  
448 467-472.
- 449 Chen Y, Takita J, Choi YL, Kato M, Ohira M, Sanada M, Wang L, Soda M, Kikuchi A, Igarashi T et al. 2008.  
450 Oncogenic mutations of ALK kinase in neuroblastoma. *Nature* **455**: 971-974.
- 451 Chiang DY, Villanueva A, Hoshida Y, Peix J, Newell P, Minguez B, LeBlanc AC, Donovan DJ, Thung SN, Sole  
452 M et al. 2008. Focal gains of VEGFA and molecular classification of hepatocellular carcinoma.  
453 *Cancer research* **68**: 6779-6788.
- 454 Chigrinova E, Rinaldi A, Kwee I, Rossi D, Rancoita PM, Strefford JC, Oscier D, Stamatopoulos K, Papadaki T,  
455 Berger F et al. 2013. Two main genetic pathways lead to the transformation of chronic  
456 lymphocytic leukemia to Richter syndrome. *Blood* **122**: 2673-2682.
- 457 Compagno M, Lim WK, Grunn A, Nandula SV, Brahmachary M, Shen Q, Bertoni F, Ponzoni M, Scandurra  
458 M, Califano A et al. 2009. Mutations of multiple genes cause deregulation of NF-kappaB in diffuse  
459 large B-cell lymphoma. *Nature* **459**: 717-721.
- 460 Davis RE, Ngo VN, Lenz G, Tolar P, Young RM, Romesser PB, Kohlhammer H, Lamy L, Zhao H, Yang Y et al.  
461 2010. Chronic active B-cell-receptor signalling in diffuse large B-cell lymphoma. *Nature* **463**: 88-  
462 92.
- 463 Diakos C, Xiao Y, Zheng S, Kager L, Dworzak M, Wiemels JL. 2014. Direct and indirect targets of the E2A-  
464 PBX1 leukemia-specific fusion protein. *PLoS one* **9**: e87602.
- 465 Dickens NJ, Walker BA, Leone PE, Johnson DC, Brito JL, Zeisig A, Jenner MW, Boyd KD, Gonzalez D, Gregory  
466 WM et al. 2010. Homozygous deletion mapping in myeloma samples identifies genes and an  
467 expression signature relevant to pathogenesis and outcome. *Clinical cancer research : an official*  
468 *journal of the American Association for Cancer Research* **16**: 1856-1864.
- 469 Dulak AM, Schumacher SE, van Lieshout J, Imamura Y, Fox C, Shim B, Ramos AH, Saksena G, Baca SC,  
470 Baselga J et al. 2012. Gastrointestinal adenocarcinomas of the esophagus, stomach, and colon  
471 exhibit distinct patterns of genome instability and oncogenesis. *Cancer research* **72**: 4383-4393.
- 472 Ernst P, Smale ST. 1995. Combinatorial regulation of transcription II: The immunoglobulin mu heavy chain  
473 gene. *Immunity* **2**: 427-438.

- 474 Forshew T, Tatevossian RG, Lawson AR, Ma J, Neale G, Ogunkolade BW, Jones TA, Aarum J, Dalton J, Bailey  
475 S et al. 2009. Activation of the ERK/MAPK pathway: a signature genetic defect in posterior fossa  
476 pilocytic astrocytomas. *J Pathol* **218**: 172-181.
- 477 Fresquet V, Robles EF, Parker A, Martinez-Useros J, Mena M, Malumbres R, Agirre X, Catarino S, Arteta D,  
478 Osaba L et al. 2012. High-throughput sequencing analysis of the chromosome 7q32 deletion  
479 reveals IRF5 as a potential tumour suppressor in splenic marginal-zone lymphoma. *British journal*  
480 *of haematology* **158**: 712-726.
- 481 Garcia-Ramirez I, Tadros S, Gonzalez-Herrero I, Martin-Lorenzo A, Rodriguez-Hernandez G, Moore D, Ruiz-  
482 Roca L, Blanco O, Alonso-Lopez D, De Las Rivas J et al. 2017. Crebbp loss cooperates with Bcl2  
483 over-expression to promote lymphoma in mice. *Blood* doi:10.1182/blood-2016-08-733469.
- 484 Gloury R, Zotos D, Zuidschewoude M, Masson F, Liao Y, Hasbold J, Corcoran LM, Hodgkin PD, Belz GT, Shi  
485 W et al. 2016. Dynamic changes in Id3 and E-protein activity orchestrate germinal center and  
486 plasma cell development. *The Journal of experimental medicine* **213**: 1095-1111.
- 487 Goransson H, Edlund K, Rydaker M, Rasmussen M, Winquist J, Ekman S, Bergqvist M, Thomas A, Lambe  
488 M, Rosenquist R et al. 2009. Quantification of normal cell fraction and copy number neutral LOH  
489 in clinical lung cancer samples using SNP array data. *PLoS one* **4**: e6057.
- 490 Green MR, Aya-Bonilla C, Gandhi MK, Lea RA, Wellwood J, Wood P, Marlton P, Griffiths LR. 2011.  
491 Integrative genomic profiling reveals conserved genetic mechanisms for tumorigenesis in  
492 common entities of non-Hodgkin's lymphoma. *Genes, chromosomes & cancer* **50**: 313-326.
- 493 Green MR, Kihira S, Liu CL, Nair RV, Salari R, Gentles AJ, Irish J, Stehr H, Vicente-Duenas C, Romero-  
494 Camarero I et al. 2015. Mutations in early follicular lymphoma progenitors are associated with  
495 suppressed antigen presentation. *Proceedings of the National Academy of Sciences of the United*  
496 *States of America* **112**: E1116-1125.
- 497 Green MR, Vicente-Duenas C, Romero-Camarero I, Long Liu C, Dai B, Gonzalez-Herrero I, Garcia-Ramirez  
498 I, Alonso-Escudero E, Iqbal J, Chan WC et al. 2014. Transient expression of Bcl6 is sufficient for  
499 oncogenic function and induction of mature B-cell lymphoma. *Nature communications* **5**: 3904.
- 500 Gunnarsson R, Mansouri L, Isaksson A, Goransson H, Cahill N, Jansson M, Rasmussen M, Lundin J, Norin S,  
501 Buhl AM et al. 2011. Array-based genomic screening at diagnosis and during follow-up in chronic  
502 lymphocytic leukemia. *Haematologica* **96**: 1161-1169.
- 503 Hanahan D, Weinberg RA. 2011. Hallmarks of cancer: the next generation. *Cell* **144**: 646-674.
- 504 Harder L, Eschenburg G, Zech A, Kriebitzsch N, Otto B, Streichert T, Behlich AS, Dierck K, Klingler B, Hansen  
505 A et al. 2013. Aberrant ZNF423 impedes B cell differentiation and is linked to adverse outcome of  
506 ETV6-RUNX1 negative B precursor acute lymphoblastic leukemia. *The Journal of experimental*  
507 *medicine* **210**: 2289-2304.
- 508 Hartmann S, Gesk S, Scholtysik R, Kreuz M, Bug S, Vater I, Doring C, Cogliatti S, Parrens M, Merlio JP et al.  
509 2010. High resolution SNP array genomic profiling of peripheral T cell lymphomas, not otherwise  
510 specified, identifies a subgroup with chromosomal aberrations affecting the REL locus. *British*  
511 *journal of haematology* **148**: 402-412.
- 512 Haverty PM, Fridlyand J, Li L, Getz G, Beroukhim R, Lohr S, Wu TD, Cavet G, Zhang Z, Chant J. 2008. High-  
513 resolution genomic and expression analyses of copy number alterations in breast tumors. *Genes,*  
514 *chromosomes & cancer* **47**: 530-542.
- 515 Haverty PM, Hon LS, Kaminker JS, Chant J, Zhang Z. 2009. High-resolution analysis of copy number  
516 alterations and associated expression changes in ovarian tumors. *BMC Med Genomics* **2**: 21.
- 517 Hu N, Wang C, Ng D, Clifford R, Yang HH, Tang ZZ, Wang QH, Han XY, Giffen C, Goldstein AM et al. 2009.  
518 Genomic characterization of esophageal squamous cell carcinoma from a high-risk population in  
519 China. *Cancer research* **69**: 5908-5917.

- 520 Huang DW, Sherman BT, Tan Q, Kir J, Liu D, Bryant D, Guo Y, Stephens R, Baseler MW, Lane HC et al. 2007.  
521 DAVID Bioinformatics Resources: expanded annotation database and novel algorithms to better  
522 extract biology from large gene lists. *Nucleic acids research* **35**: W169-175.
- 523 Huang YT, Lin X, Chirieac LR, McGovern R, Wain JC, Heist RS, Skaug V, Zienolddiny S, Haugen A, Su L et al.  
524 2011. Impact on disease development, genomic location and biological function of copy number  
525 alterations in non-small cell lung cancer. *PloS one* **6**: e22961.
- 526 Iida S, Rao PH, Butler M, Corradini P, Boccadoro M, Klein B, Chaganti RS, Dalla-Favera R. 1997.  
527 Deregulation of MUM1/IRF4 by chromosomal translocation in multiple myeloma. *Nature genetics*  
528 **17**: 226-230.
- 529 Johnson WE, Li C, Rabinovic A. 2007. Adjusting batch effects in microarray expression data using empirical  
530 Bayes methods. *Biostatistics* **8**: 118-127.
- 531 Joos S, Otano-Joos MI, Ziegler S, Bruderlein S, du Manoir S, Bentz M, Moller P, Lichter P. 1996. Primary  
532 mediastinal (thymic) B-cell lymphoma is characterized by gains of chromosomal material including  
533 9p and amplification of the REL gene. *Blood* **87**: 1571-1578.
- 534 Karolchik D, Hinrichs AS, Furey TS, Roskin KM, Sugnet CW, Haussler D, Kent WJ. 2004. The UCSC Table  
535 Browser data retrieval tool. *Nucleic acids research* **32**: D493-496.
- 536 Kato M, Sanada M, Kato I, Sato Y, Takita J, Takeuchi K, Niwa A, Chen Y, Nakazaki K, Nomoto J et al. 2009.  
537 Frequent inactivation of A20 in B-cell lymphomas. *Nature* **459**: 712-716.
- 538 Kawamata N, Ogawa S, Gueller S, Ross SH, Huynh T, Chen J, Chang A, Nabavi-Nouis S, Megrabian N, Siebert  
539 R et al. 2009. Identified hidden genomic changes in mantle cell lymphoma using high-resolution  
540 single nucleotide polymorphism genomic array. *Experimental hematology* **37**: 937-946.
- 541 Koboldt DC, Zhang Q, Larson DE, Shen D, McLellan MD, Lin L, Miller CA, Mardis ER, Ding L, Wilson RK. 2012.  
542 VarScan 2: somatic mutation and copy number alteration discovery in cancer by exome  
543 sequencing. *Genome research* **22**: 568-576.
- 544 Kondo Y, Nagai K, Nakahata S, Saito Y, Ichikawa T, Suekane A, Taki T, Iwakawa R, Enari M, Taniwaki M et  
545 al. 2012. Overexpression of the DNA sensor proteins, absent in melanoma 2 and interferon-  
546 inducible 16, contributes to tumorigenesis of oral squamous cell carcinoma with p53 inactivation.  
547 *Cancer Sci* **103**: 782-790.
- 548 Kuilman T, Velds A, Kemper K, Ranzani M, Bombardelli L, Hoogstraat M, Nevedomskaya E, Xu G, de Rooter  
549 J, Lolkema MP et al. 2015. CopywriteR: DNA copy number detection from off-target sequence  
550 data. *Genome biology* **16**: 49.
- 551 Kuiper RP, Schoenmakers EF, van Reijmersdal SV, Hehir-Kwa JY, van Kessel AG, van Leeuwen FN,  
552 Hoogerbrugge PM. 2007. High-resolution genomic profiling of childhood ALL reveals novel  
553 recurrent genetic lesions affecting pathways involved in lymphocyte differentiation and cell cycle  
554 progression. *Leukemia* **21**: 1258-1266.
- 555 Kuiper RP, Waanders E, van der Velden VH, van Reijmersdal SV, Venkatachalam R, Scheijen B, Sonneveld  
556 E, van Dongen JJ, Veerman AJ, van Leeuwen FN et al. 2010. IKZF1 deletions predict relapse in  
557 uniformly treated pediatric precursor B-ALL. *Leukemia* **24**: 1258-1264.
- 558 Kupperts R. 2005. Mechanisms of B-cell lymphoma pathogenesis. *Nature reviews Cancer* **5**: 251-262.
- 559 Lenz G, Davis RE, Ngo VN, Lam L, George TC, Wright GW, Dave SS, Zhao H, Xu W, Rosenwald A et al. 2008a.  
560 Oncogenic CARD11 mutations in human diffuse large B cell lymphoma. *Science* **319**: 1676-1679.
- 561 Lenz G, Wright G, Dave SS, Xiao W, Powell J, Zhao H, Xu W, Tan B, Goldschmidt N, Iqbal J et al. 2008b.  
562 Stromal gene signatures in large-B-cell lymphomas. *The New England journal of medicine* **359**:  
563 2313-2323.
- 564 Lenz G, Wright GW, Emre NC, Kohlhammer H, Dave SS, Davis RE, Carty S, Lam LT, Shaffer AL, Xiao W et al.  
565 2008c. Molecular subtypes of diffuse large B-cell lymphoma arise by distinct genetic pathways.  
566 *Proceedings of the National Academy of Sciences of the United States of America* **105**: 13520-  
567 13525.

- 568 Lerdrup M, Johansen JV, Agrawal-Singh S, Hansen K. 2016. An interactive environment for agile analysis  
569 and visualization of ChIP-sequencing data. *Nature structural & molecular biology* **23**: 349-357.
- 570 Li H. 2013. Aligning sequence reads, clone sequences and assembly contigs with BWAMEM. *arXiv* **1303**:  
571 3997.
- 572 Li H, Kaminski MS, Li Y, Yildiz M, Ouillette P, Jones S, Fox H, Jacobi K, Saiya-Cork K, Bixby D et al. 2014.  
573 Mutations in linker histone genes HIST1H1 B, C, D, and E; OCT2 (POU2F2); IRF8; and ARID1A  
574 underlying the pathogenesis of follicular lymphoma. *Blood* **123**: 1487-1498.
- 575 Lilljebjorn H, Sonesson C, Andersson A, Heldrup J, Behrendtz M, Kawamata N, Ogawa S, Koeffler HP,  
576 Mitelman F, Johansson B et al. 2010. The correlation pattern of acquired copy number changes in  
577 164 ETV6/RUNX1-positive childhood acute lymphoblastic leukemias. *Hum Mol Genet* **19**: 3150-  
578 3158.
- 579 McKenna A, Hanna M, Banks E, Sivachenko A, Cibulskis K, Kernytsky A, Garimella K, Altshuler D, Gabriel S,  
580 Daly M et al. 2010. The Genome Analysis Toolkit: a MapReduce framework for analyzing next-  
581 generation DNA sequencing data. *Genome research* **20**: 1297-1303.
- 582 Mermel CH, Schumacher SE, Hill B, Meyerson ML, Beroukhi R, Getz G. 2011. GISTIC2.0 facilitates  
583 sensitive and confident localization of the targets of focal somatic copy-number alteration in  
584 human cancers. *Genome biology* **12**: R41.
- 585 Messina M, Del Giudice I, Khiabani H, Rossi D, Chiaretti S, Rasi S, Spina V, Holmes AB, Marinelli M, Fabbri  
586 G et al. 2014. Genetic lesions associated with chronic lymphocytic leukemia chemo-refractoriness.  
587 *Blood* **123**: 2378-2388.
- 588 Micke P, Edlund K, Holmberg L, Kultima HG, Mansouri L, Ekman S, Bergqvist M, Scheibenflug L, Lamberg  
589 K, Myrdal G et al. 2011. Gene copy number aberrations are associated with survival in histologic  
590 subgroups of non-small cell lung cancer. *J Thorac Oncol* **6**: 1833-1840.
- 591 Miller S, Rogers HA, Lyon P, Rand V, Adamowicz-Brice M, Clifford SC, Hayden JT, Dyer S, Pfister S,  
592 Korshunov A et al. 2011. Genome-wide molecular characterization of central nervous system  
593 primitive neuroectodermal tumor and pineoblastoma. *Neuro Oncol* **13**: 866-879.
- 594 Monni O, Joensuu H, Franssila K, Klefstrom J, Alitalo K, Knuutila S. 1997. BCL2 overexpression associated  
595 with chromosomal amplification in diffuse large B-cell lymphoma. *Blood* **90**: 1168-1174.
- 596 Monti S, Chapuy B, Takeyama K, Rodig SJ, Hao Y, Yeda KT, Inguilizian H, Mermel C, Currie T, Dogan A et al.  
597 2012. Integrative analysis reveals an outcome-associated and targetable pattern of p53 and cell  
598 cycle deregulation in diffuse large B cell lymphoma. *Cancer cell* **22**: 359-372.
- 599 Mosca L, Fabris S, Lionetti M, Todoerti K, Agnelli L, Morabito F, Cutrona G, Andronache A, Matis S, Ferrari  
600 F et al. 2010. Integrative genomics analyses reveal molecularly distinct subgroups of B-cell chronic  
601 lymphocytic leukemia patients with 13q14 deletion. *Clinical cancer research : an official journal of*  
602 *the American Association for Cancer Research* **16**: 5641-5653.
- 603 Mullighan CG. 2012. Molecular genetics of B-precursor acute lymphoblastic leukemia. *The Journal of*  
604 *clinical investigation* **122**: 3407-3415.
- 605 Mullighan CG, Goorha S, Radtke I, Miller CB, Coustan-Smith E, Dalton JD, Girtman K, Mathew S, Ma J,  
606 Pounds SB et al. 2007. Genome-wide analysis of genetic alterations in acute lymphoblastic  
607 leukaemia. *Nature* **446**: 758-764.
- 608 Mullighan CG, Miller CB, Radtke I, Phillips LA, Dalton J, Ma J, White D, Hughes TP, Le Beau MM, Pui CH et  
609 al. 2008a. BCR-ABL1 lymphoblastic leukaemia is characterized by the deletion of Ikaros. *Nature*  
610 **453**: 110-114.
- 611 Mullighan CG, Phillips LA, Su X, Ma J, Miller CB, Shurtleff SA, Downing JR. 2008b. Genomic analysis of the  
612 clonal origins of relapsed acute lymphoblastic leukemia. *Science* **322**: 1377-1380.
- 613 Mullighan CG, Su X, Zhang J, Radtke I, Phillips LA, Miller CB, Ma J, Liu W, Cheng C, Schulman BA et al. 2009.  
614 Deletion of IKZF1 and prognosis in acute lymphoblastic leukemia. *The New England journal of*  
615 *medicine* **360**: 470-480.

- 616 Ng SB, Turner EH, Robertson PD, Flygare SD, Bigham AW, Lee C, Shaffer T, Wong M, Bhattacharjee A,  
617 Eichler EE et al. 2009. Targeted capture and massively parallel sequencing of 12 human exomes.  
618 *Nature* **461**: 272-276.
- 619 Ngo VN, Young RM, Schmitz R, Jhavar S, Xiao W, Lim KH, Kohlhammer H, Xu W, Yang Y, Zhao H et al. 2011.  
620 Oncogenically active MYD88 mutations in human lymphoma. *Nature* **470**: 115-119.
- 621 Northcott PA, Nakahara Y, Wu X, Feuk L, Ellison DW, Croul S, Mack S, Kongkham PN, Peacock J, Dubuc A  
622 et al. 2009. Multiple recurrent genetic events converge on control of histone lysine methylation  
623 in medulloblastoma. *Nature genetics* **41**: 465-472.
- 624 Nowak D, Ogawa S, Muschen M, Kato M, Kawamata N, Meixel A, Nowak V, Kim HS, Kang S, Paquette R et  
625 al. 2010. SNP array analysis of tyrosine kinase inhibitor-resistant chronic myeloid leukemia  
626 identifies heterogeneous secondary genomic alterations. *Blood* **115**: 1049-1053.
- 627 Okosun J, Bodor C, Wang J, Araf S, Yang CY, Pan C, Boller S, Cittaro D, Bozek M, Iqbal S et al. 2014.  
628 Integrated genomic analysis identifies recurrent mutations and evolution patterns driving the  
629 initiation and progression of follicular lymphoma. *Nature genetics* **46**: 176-181.
- 630 Oricchio E, Nanjangud G, Wolfe AL, Schatz JH, Mavrakis KJ, Jiang M, Liu X, Bruno J, Heguy A, Olshen AB et  
631 al. 2011. The Eph-receptor A7 is a soluble tumor suppressor for follicular lymphoma. *Cell* **147**: 554-  
632 564.
- 633 Pasqualucci L, Compagno M, Houldsworth J, Monti S, Grunn A, Nandula SV, Aster JC, Murty VV, Shipp MA,  
634 Dalla-Favera R. 2006. Inactivation of the PRDM1/BLIMP1 gene in diffuse large B cell lymphoma.  
635 *The Journal of experimental medicine* **203**: 311-317.
- 636 Paulsson K, Cazier JB, Macdougall F, Stevens J, Stasevich I, Vrcelj N, Chaplin T, Lillington DM, Lister TA,  
637 Young BD. 2008. Microdeletions are a general feature of adult and adolescent acute lymphoblastic  
638 leukemia: Unexpected similarities with pediatric disease. *Proceedings of the National Academy of  
639 Sciences of the United States of America* **105**: 6708-6713.
- 640 Poage GM, Christensen BC, Houseman EA, McClean MD, Wiencke JK, Posner MR, Clark JR, Nelson HH,  
641 Marsit CJ, Kelsey KT. 2010. Genetic and epigenetic somatic alterations in head and neck squamous  
642 cell carcinomas are globally coordinated but not locally targeted. *PLoS one* **5**: e9651.
- 643 Radtke I, Mullighan CG, Ishii M, Su X, Cheng J, Ma J, Ganti R, Cai Z, Goorha S, Pounds SB et al. 2009.  
644 Genomic analysis reveals few genetic alterations in pediatric acute myeloid leukemia. *Proceedings  
645 of the National Academy of Sciences of the United States of America* **106**: 12944-12949.
- 646 Rao PH, Houldsworth J, Dyomina K, Parsa NZ, Cigudosa JC, Louie DC, Popplewell L, Offit K, Jhanwar SC,  
647 Chaganti RS. 1998. Chromosomal and gene amplification in diffuse large B-cell lymphoma. *Blood*  
648 **92**: 234-240.
- 649 Reich M, Liefeld T, Gould J, Lerner J, Tamayo P, Mesirov JP. 2006. GenePattern 2.0. *Nature genetics* **38**:  
650 500-501.
- 651 Reid JF, Gariboldi M, Sokolova V, Capobianco P, Lampis A, Perrone F, Signoroni S, Costa A, Leo E, Pilotti S  
652 et al. 2009. Integrative approach for prioritizing cancer genes in sporadic colon cancer. *Genes,  
653 chromosomes & cancer* **48**: 953-962.
- 654 Rinaldi A, Mian M, Chigrinova E, Arcaini L, Bhagat G, Novak U, Rancoita PM, De Campos CP, Forconi F,  
655 Gascoyne RD et al. 2011. Genome-wide DNA profiling of marginal zone lymphomas identifies  
656 subtype-specific lesions with an impact on the clinical outcome. *Blood* **117**: 1595-1604.
- 657 Robinson JT, Thorvaldsdottir H, Winckler W, Guttman M, Lander ES, Getz G, Mesirov JP. 2011. Integrative  
658 genomics viewer. *Nature biotechnology* **29**: 24-26.
- 659 Rohde KH, Veiga DF, Caldwell S, Balazsi G, Russell DG. 2012. Linking the transcriptional profiles and the  
660 physiological states of Mycobacterium tuberculosis during an extended intracellular infection.  
661 *PLoS pathogens* **8**: e1002769.
- 662 Rosenwald A, Wright G, Wiestner A, Chan WC, Connors JM, Campo E, Gascoyne RD, Grogan TM, Muller-  
663 Hermelink HK, Smeland EB et al. 2003. The proliferation gene expression signature is a

- 664 quantitative integrator of oncogenic events that predicts survival in mantle cell lymphoma. *Cancer*  
665 *cell* **3**: 185-197.
- 666 Rucker FG, Schlenk RF, Bullinger L, Kayser S, Teleanu V, Kett H, Habdank M, Kugler CM, Holzmann K,  
667 Gaidzik VI et al. 2012. TP53 alterations in acute myeloid leukemia with complex karyotype  
668 correlate with specific copy number alterations, monosomal karyotype, and dismal outcome.  
669 *Blood* **119**: 2114-2121.
- 670 Salaverria I, Royo C, Carvajal-Cuenca A, Clot G, Navarro A, Valera A, Song JY, Woroniecka R, Rymkiewicz  
671 G, Klapper W et al. 2013. CCND2 rearrangements are the most frequent genetic events in cyclin  
672 D1(-) mantle cell lymphoma. *Blood* **121**: 1394-1402.
- 673 Scandurra M, Mian M, Greiner TC, Rancoita PM, De Campos CP, Chan WC, Vose JM, Chigrinova E, Inghirami  
674 G, Chiappella A et al. 2010. Genomic lesions associated with a different clinical outcome in diffuse  
675 large B-Cell lymphoma treated with R-CHOP-21. *British journal of haematology* **151**: 221-231.
- 676 Schraders M, van Reijmersdal SV, Kamping EJ, van Krieken JH, van Kessel AG, Groenen PJ, Hoogerbrugge  
677 PM, Kuiper RP. 2009. High-resolution genomic profiling of pediatric lymphoblastic lymphomas  
678 reveals subtle differences with pediatric acute lymphoblastic leukemias in the B-lineage. *Cancer*  
679 *genetics and cytogenetics* **191**: 27-33.
- 680 Scotto L, Narayan G, Nandula SV, Arias-Pulido H, Subramaniam S, Schneider A, Kaufmann AM, Wright JD,  
681 Pothuri B, Mansukhani M et al. 2008. Identification of copy number gain and overexpressed genes  
682 on chromosome arm 20q by an integrative genomic approach in cervical cancer: potential role in  
683 progression. *Genes, chromosomes & cancer* **47**: 755-765.
- 684 Shaffer AL, Rosenwald A, Staudt LM. 2002. Lymphoid malignancies: the dark side of B-cell differentiation.  
685 *Nature reviews Immunology* **2**: 920-932.
- 686 Sos ML, Michel K, Zander T, Weiss J, Frommolt P, Peifer M, Li D, Ullrich R, Koker M, Fischer F et al. 2009.  
687 Predicting drug susceptibility of non-small cell lung cancers based on genetic lesions. *The Journal*  
688 *of clinical investigation* **119**: 1727-1740.
- 689 Tosello V, Mansour MR, Barnes K, Paganin M, Sulis ML, Jenkinson S, Allen CG, Gale RE, Linch DC, Palomero  
690 T et al. 2009. WT1 mutations in T-ALL. *Blood* **114**: 1038-1045.
- 691 Walker BA, Leone PE, Chiecchio L, Dickens NJ, Jenner MW, Boyd KD, Johnson DC, Gonzalez D, Dagrada GP,  
692 Protheroe RK et al. 2010. A compendium of myeloma-associated chromosomal copy number  
693 abnormalities and their prognostic value. *Blood* **116**: e56-65.
- 694 Wang JQ, Jeelall YS, Humburg P, Batchelor EL, Kaya SM, Yoo HM, Goodnow CC, Horikawa K. 2017.  
695 Synergistic cooperation and crosstalk between MYD88L265P and mutations that dysregulate  
696 CD79B and surface IgM. *The Journal of experimental medicine* doi:10.1084/jem.20161454.
- 697 Wilkerson MD, Yin X, Walter V, Zhao N, Cabanski CR, Hayward MC, Miller CR, Socinski MA, Parsons AM,  
698 Thorne LB et al. 2012. Differential pathogenesis of lung adenocarcinoma subtypes involving  
699 sequence mutations, copy number, chromosomal instability, and methylation. *PLoS one* **7**:  
700 e36530.
- 701 Willis TG, Dyer MJ. 2000. The role of immunoglobulin translocations in the pathogenesis of B-cell  
702 malignancies. *Blood* **96**: 808-822.
- 703 Wilson WH, Young RM, Schmitz R, Yang Y, Pittaluga S, Wright G, Lih CJ, Williams PM, Shaffer AL, Gerecitano  
704 J et al. 2015. Targeting B cell receptor signaling with ibrutinib in diffuse large B cell lymphoma.  
705 *Nature medicine* **21**: 922-926.
- 706 Wohner M, Tagoh H, Bilic I, Jaritz M, Poliakova DK, Fischer M, Busslinger M. 2016. Molecular functions of  
707 the transcription factors E2A and E2-2 in controlling germinal center B cell and plasma cell  
708 development. *The Journal of experimental medicine* **213**: 1201-1221.
- 709 Wright G, Tan B, Rosenwald A, Hurt EH, Wiestner A, Staudt LM. 2003. A gene expression-based method  
710 to diagnose clinically distinct subgroups of diffuse large B cell lymphoma. *Proceedings of the*  
711 *National Academy of Sciences of the United States of America* **100**: 9991-9996.

712 Yamagishi M, Nakano K, Miyake A, Yamochi T, Kagami Y, Tsutsumi A, Matsuda Y, Sato-Otsubo A, Muto S,  
713 Utsunomiya A et al. 2012. Polycomb-mediated loss of miR-31 activates NIK-dependent NF-kappaB  
714 pathway in adult T cell leukemia and other cancers. *Cancer cell* **21**: 121-135.  
715

716

717

718

719

720

721

722

723

724

725

726

727

728

729

730

731

732

733

734

735

736

737

738



739 **FIGURES AND LEGENDS**

Figure 1

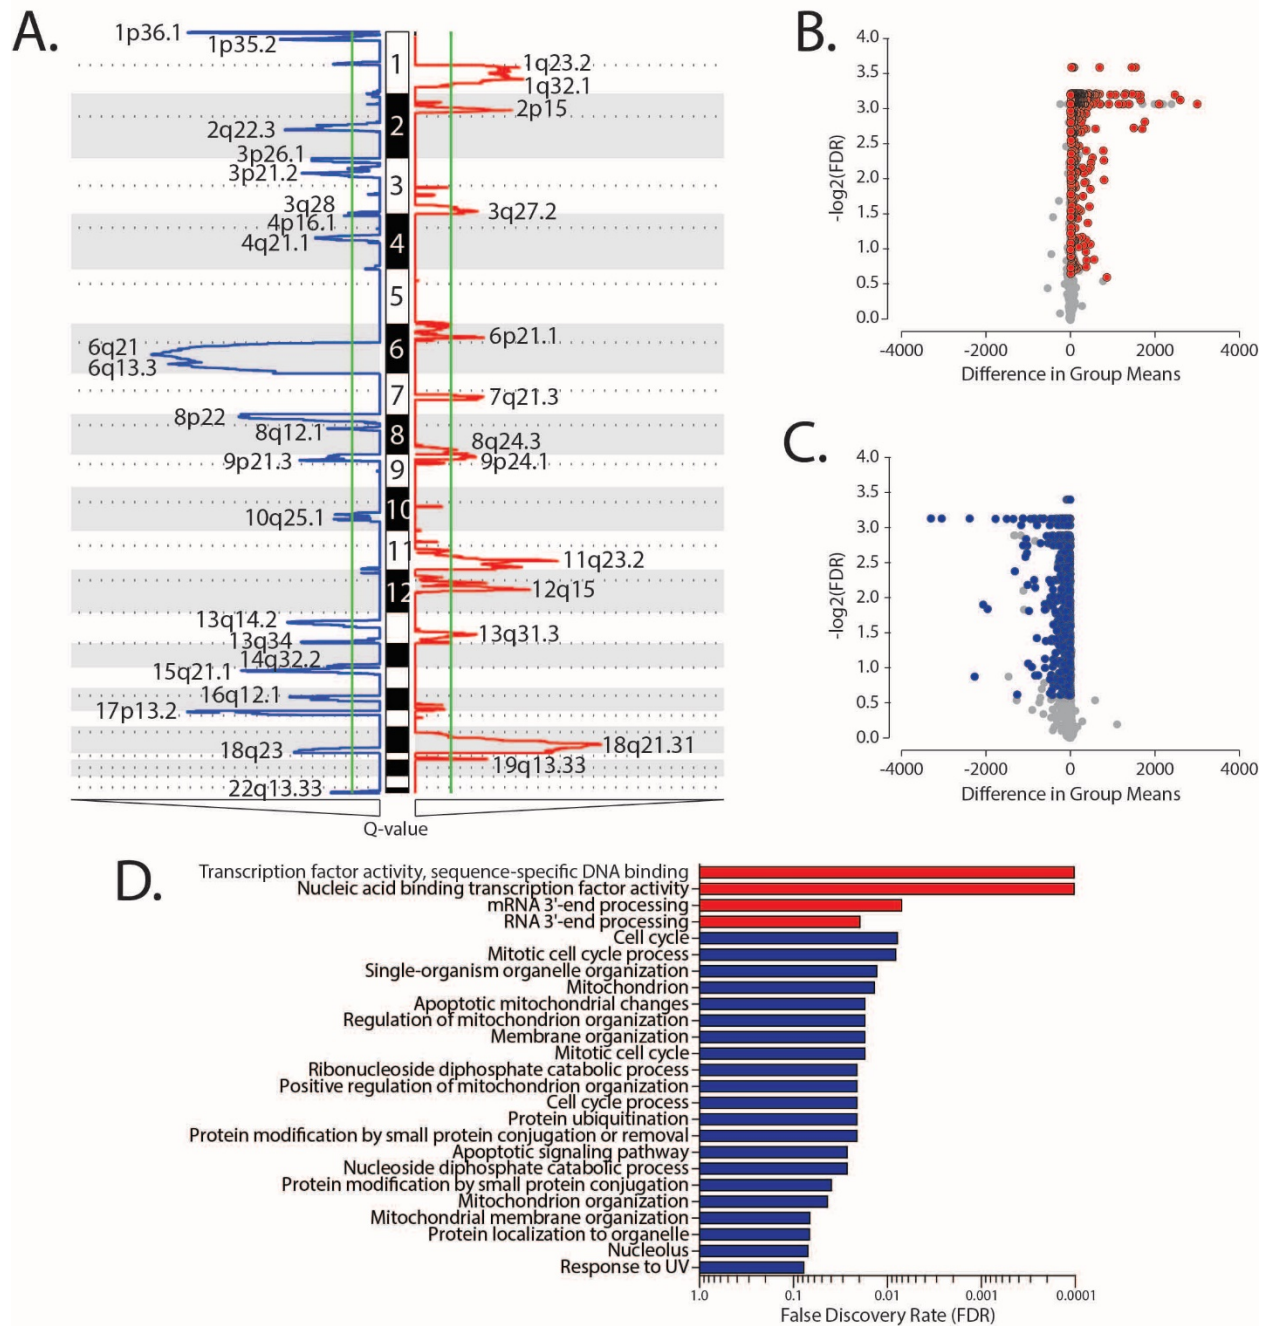

740

741 **Figure 1: Transcription factors are significantly enriched targets of DNA copy number**

742 **gains in DLBCL. A)** A GISTIC plot shows significant peaks of DNA copy number loss (blue) and

743 gain (red) identified from 673 DLBCL tumors, and labelled by their cytogenetic position. The green

744 line indicates a significance threshold of  $FDR = 0.25$ . **B)** A volcano plot of transcriptional changes  
745 of genes within peaks of DNA copy number gain in patients with each lesion compared to patients  
746 with diploid copy number. Each point represents a single gene, with red points being significantly  
747 increased in association with DNA copy number gain ( $FDR < 0.25$ ,  $fold-change \geq 1.2$ ). **C)** A volcano  
748 plot of transcriptional changes of genes within peaks of DNA copy number loss in patients with  
749 each lesion compared to patients with diploid copy number. Each point represents a single gene,  
750 with blue points being genes that are significantly reduced in association with DNA copy number  
751 loss ( $FDR < 0.25$ ,  $fold-change \geq 1.2$ ). **D)** Hypergeometric enrichment analysis of genes targeted by  
752 DNA copy number gain (red) and loss (blue). Genes with transcription factor activity were  
753 significantly enriched as targets of DNA copy number gain.

754

755

756

757

758

759

760

761

762

763

764

765

766

767

768

769

770

Figure 2

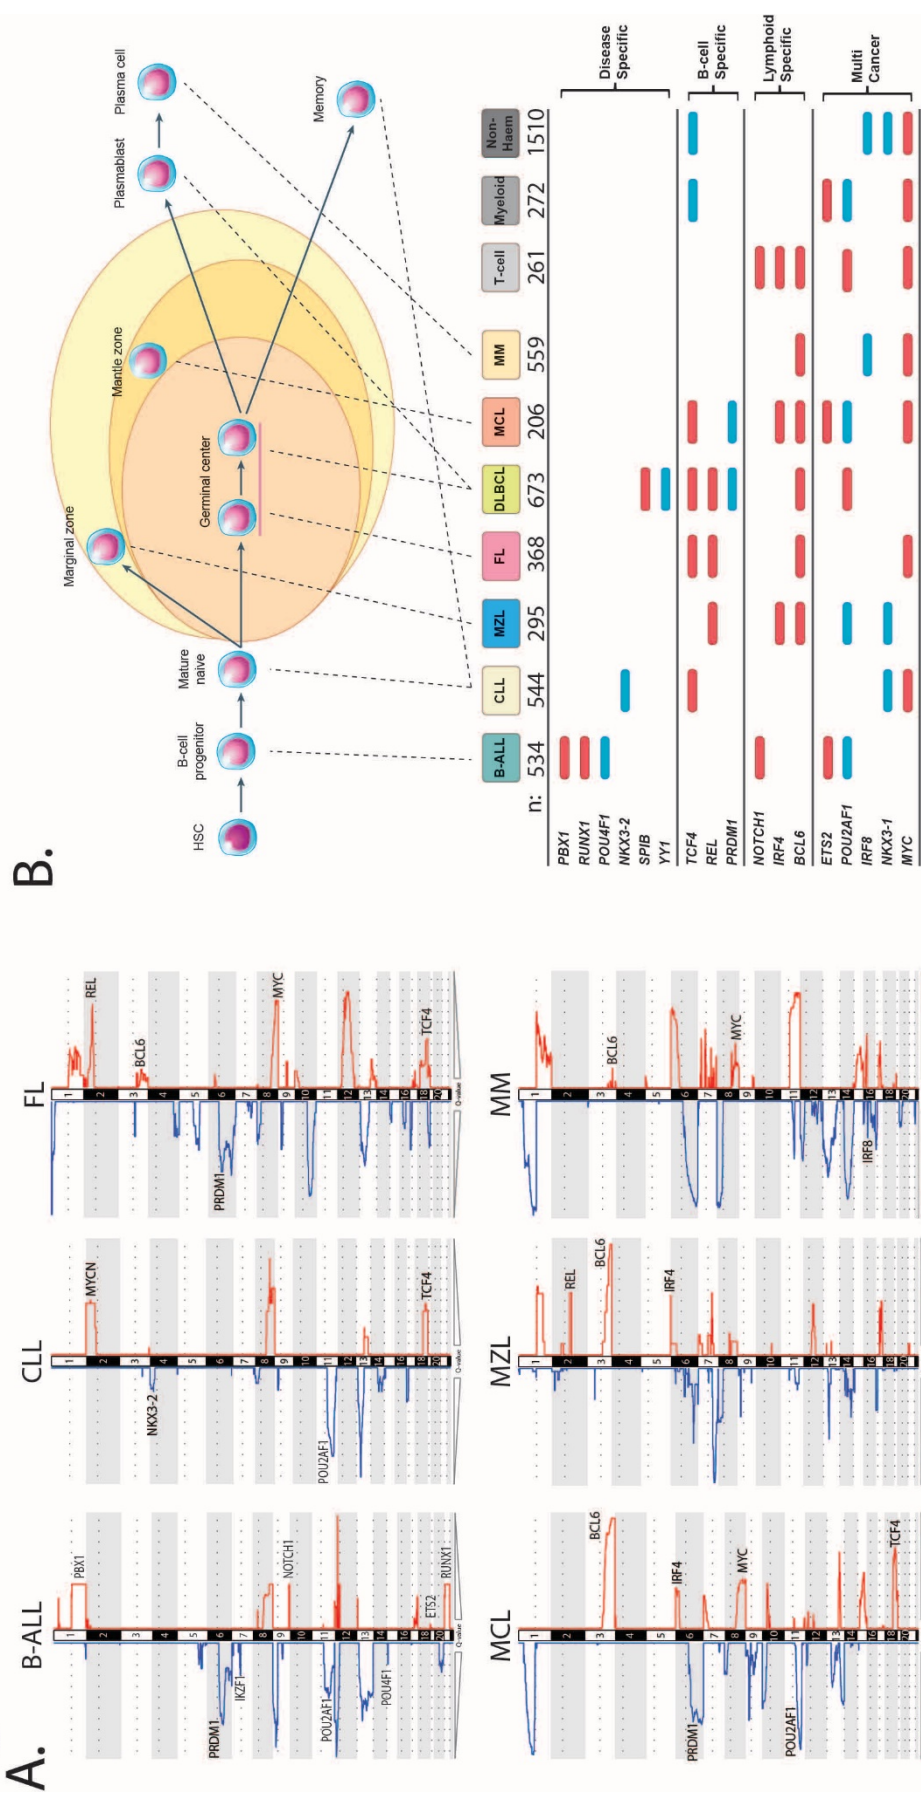

771 **Figure 2: Transcription factor genes are targeted by DNA copy number alterations across**  
772 **the spectrum of B-cell malignancies. A)** GISTIC analysis of 534 B-cell acute lymphoblastic  
773 leukemia (B-ALL), 544 chronic lymphocytic leukemia (CLL), 368 follicular lymphoma (FL), 206  
774 mantle cell lymphoma (MCL), 295 splenic/nodal marginal zone lymphoma (MZL) and 559 multiple  
775 myeloma. Peaks of DNA copy number gain (red) or loss (blue) that target transcription factors  
776 with a well-defined role in one or more stages of B-cell development are annotated with the gene  
777 symbol of the transcription factor. **B)** The representation of transcription factor alterations across  
778 the spectrum of B-cell malignancies is shown with reference to their putative 'normal counterpart'.  
779 DNA copy number alterations of some transcription factors are specific to a single disease. Others  
780 are found in multiple B-cell malignancies but not in T-cell, myeloid or non-haematological tumors.  
781 Alterations of *NOTCH1*, *IRF4* and *BCL6* are found in tumors of both the B- and T-lineage. DNA  
782 copy number changes encompassing other transcription factors are found across cancers of  
783 multiple lineages.  
784  
785  
786  
787  
788  
789  
790  
791  
792  
793  
794  
795  
796

Figure 3

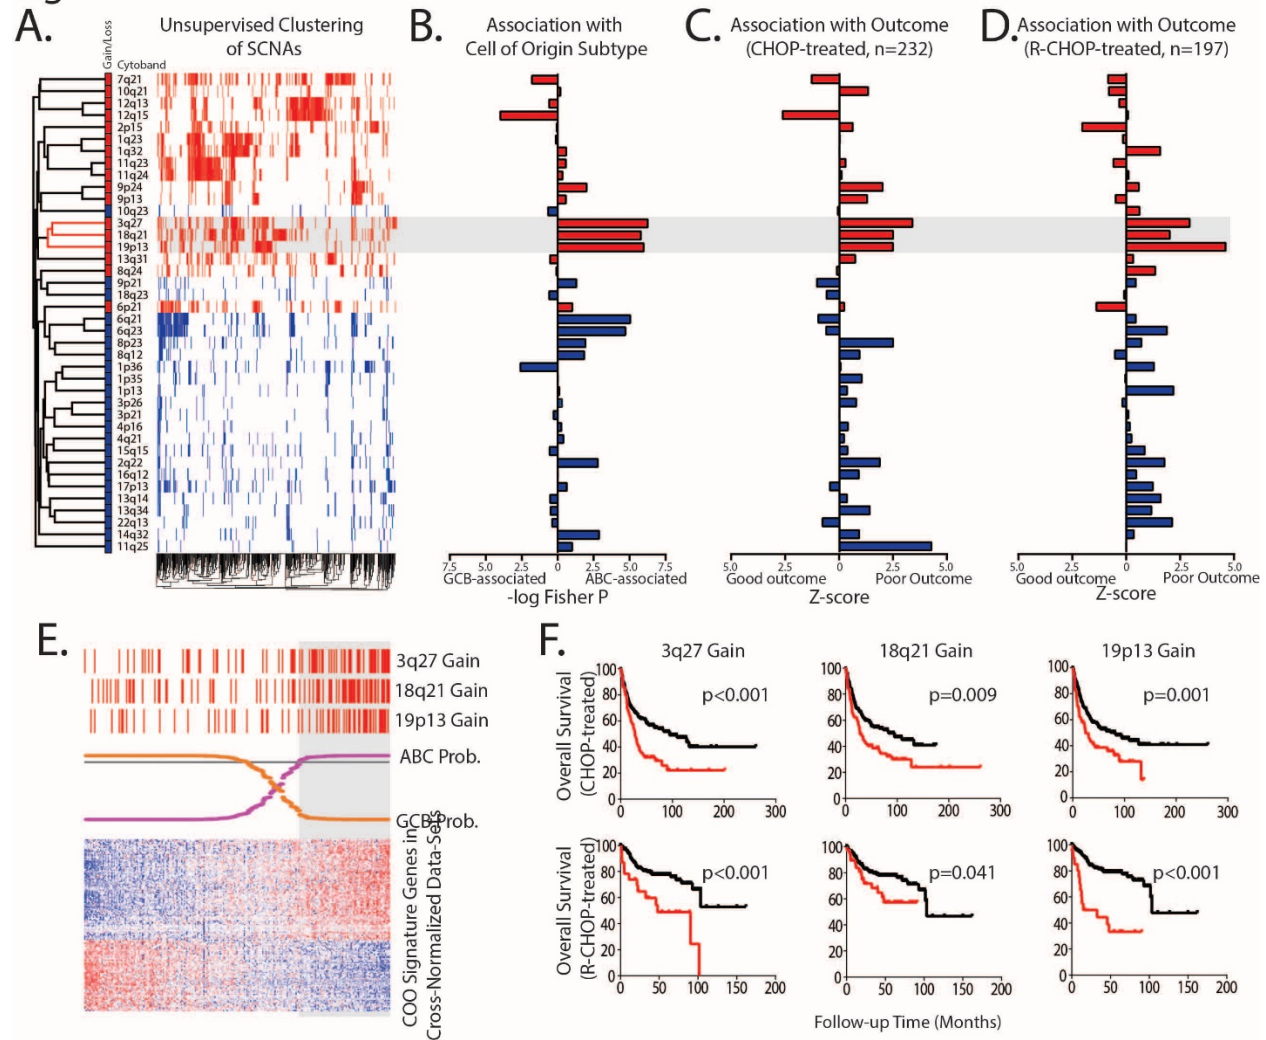

797

798 **Figure 3: Co-segregating transcription factor alterations associate with the ABC-like**

799 **subtype and poor outcome in DLBCL. A) Unsupervised hierarchical clustering of DNA copy**

800 **number gains (red) and losses (blue) in DLBCL tumors with  $\geq 2$  SCNAs. DNA copy number gains**

801 **of 3q27, 18q21 and 19p13 can be seen to cluster together, indicating co-segregation within the**

802 **same tumors. B) A bar graph illustrates the Fisher P-value for association of each alteration with**

803 **either the GCB-like (left) or ABC-like (right) cell of origin subtype. DNA copy number gains of**

804 **3q27, 18q21 and 19p13 are each significantly associated with the ABC-like subtype. C) A bar**

805 **graph illustrates the Z-score for association with good (left) or poor (right)**

806 **outcome in 232 DLBCL patients treated with the CHOP combination chemotherapy regimen.**

807 DNA copy number gains of 3q27, 18q21 and 19p13 are each significantly associated with poor  
808 outcome. **D)** A bar graph illustrates the Z-score for association of each alteration with good (left)  
809 or poor (right) outcome in 197 DLBCL patients treated with the CHOP regimen plus rituximab (R-  
810 CHOP). DNA copy number gains of 3q27, 18q21 and 19p13 are each significantly associated  
811 with poor outcome. **E)** A heatmap showing the cell of origin subtype signatures and scores  
812 determined by the 140-gene Wright algorithm, and the presence of 3q27, 18q21 and 19p13 DNA  
813 copy number gains (top, red) in tumors classified as ABC-like (right, shaded grey). This shows  
814 that the majority of ABC-like tumors possess one or more of these lesions, but they are not  
815 exclusive to this subtype. **F)** Kaplan-Meier curves show the overall survival of DLBCL patients  
816 treated with CHOP (above) or R-CHOP (below), separated by the presence (red) or absence  
817 (black) of DNA copy number gains at 3q27 (left), 18q21 (middle), or 19p13 (right). P-values were  
818 calculated using a log-rank test.

819

820

821

822

823

824

825

826

827

828

829

830

831

832

## Figure 4

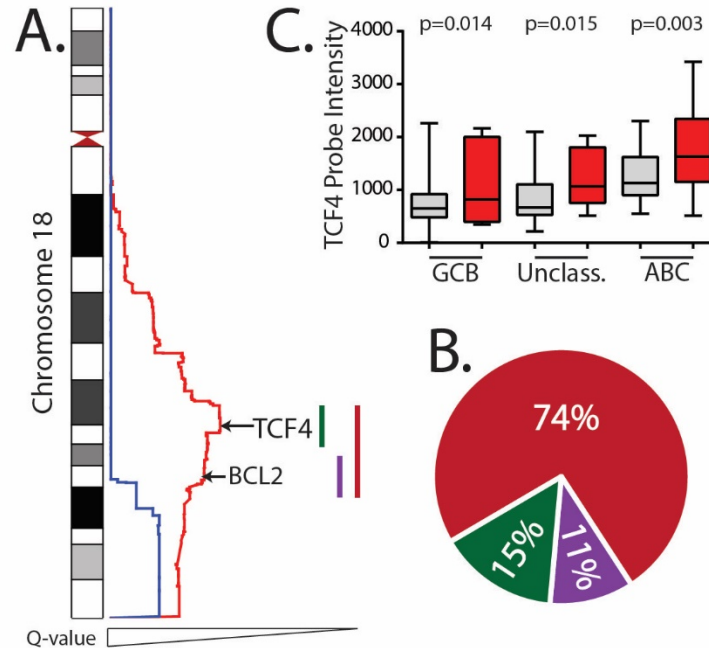

833

834 **Figure 4: DNA copy number gains of 18q21 target the *TCF4* (E2-2) gene. A)** The GISTIC  
835 scores for DNA copy number gain (red) and loss (blue) are shown for chromosome 18. It can be  
836 seen that the peak with the lowest (most significant) Q-value calculated by GISTIC includes the  
837 *TCF4* gene, but not *BCL2*. **B)** A pie graph of cases with 18q DNA copy number gains, separated  
838 into those that show gains of both *TCF4* and *BCL2* (red), gains of *TCF4* only (green) and gains  
839 of *BCL2* only. Although the peak including *TCF4* is the most significant by GISTIC, the majority  
840 of tumors harbor DNA copy number gains that encompass both *TCF4* and *BCL2*. **C)** Box plots  
841 show the gene expression microarray probe intensity of *TCF4* in cases with diploid 18q21 (grey)  
842 or *TCF4* DNA copy number gains (red), separated by cell of origin subtype. *TCF4* shows  
843 significantly higher expression in cases with DNA copy number gain, irrespective of molecular  
844 subtype, but a higher level in ABC-like DLBCL tumors. P-values were calculated using a 2-tailed  
845 student's T-test.

846

847

Figure 5

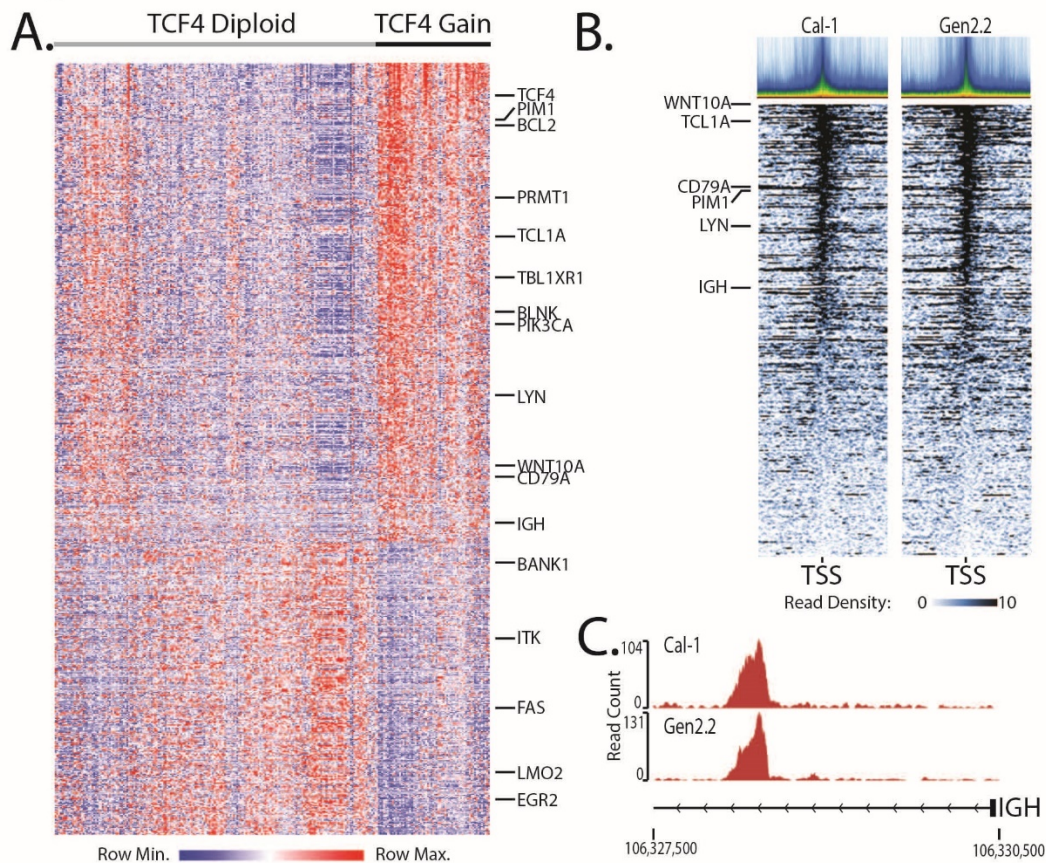

848

849 **Figure 5: DNA copy number gain of TCF4 is associated with increased expression of B-**  
850 **cell receptor signaling components. A)** A heatmap shows significantly differentially expressed  
851 genes between cases with diploid *TCF4* and *TCF4* DNA copy number gain. This increased  
852 expression of components of the B-cell receptor signaling pathway in tumors with *TCF4* gain,  
853 including *IGH*, *CD79A*, *LYN*, *BLNK*, and *PIK3CA*. **B)** A heatmap of *TCF4* binding to the  
854 transcription start site (TSS, +/- 10kb) of genes with increased expression associated with *TCF4*  
855 DNA copy number gain. This confirms binding of *TCF4* to the regulatory region of the majority of  
856 genes with increased expression associated with DNA copy number gain of *TCF4*, including *IGH*,  
857 and therefore indicates a direct link between *TCF4* copy gain and the associated transcriptional



858 changes. **C)** A diagram of the TCF4 peak downstream from the *IGH* transcription start site,  
859 highlighting strong binding at a likely enhancer element.

860

861

862

863

864

865

866

867

868

869

870

871

872

873

874

875

876

877

878

879

880

881

882

883

## Figure 6

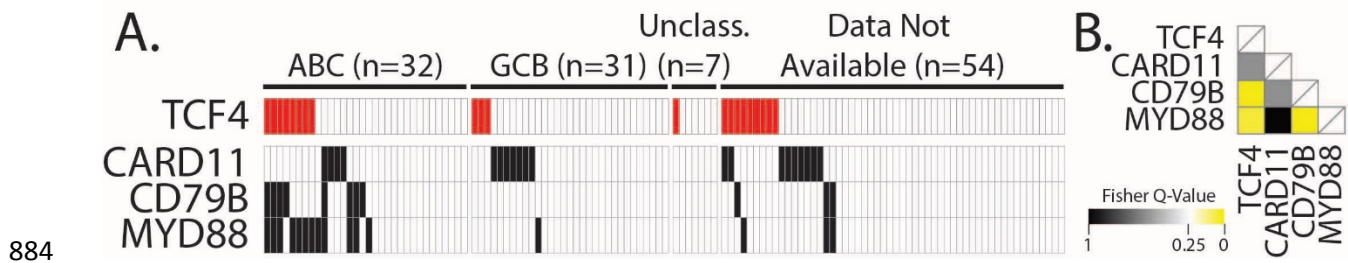

884  
885 **Figure 6: *TCF4* DNA copy number gain co-associated with other BCR signaling mutations**  
886 **in ABC-like DLBCL. A)** A heatmap shows the presence (colored) or absence (white) of *TCF4*  
887 DNA copy number gain and somatic mutations of *CARD11*, *CD79B* and *MYD88* in 124 DLBCL  
888 tumors analyzed by targeted sequencing. The data are ordered by cell of origin subtype for the  
889 70 cases with available matched gene expression profiling data. **B)** Fisher test Q-values are  
890 shown for co-association between each of the lesions in A. It can be seen that *TCF4* DNA copy  
891 number gain significantly co-associates with both *CD79B* and *MYD88* mutation, and that *CD79B*  
892 and *MYD88* mutations also significantly co-associate.
